# Title: Exogenous estradiol and oxytocin modulate sex differences in hippocampal reactivity and episodic memory

## Authors:

Marie Coenjaerts<sup>1</sup>, Isabelle Trimborn<sup>1</sup>, Berina Adrovic<sup>1</sup>, Birgit Stoffel-Wagner<sup>2</sup>,  
Larry Cahill<sup>3</sup>, Alexandra Philipsen<sup>4</sup>, René Hurlemann<sup>5,6</sup>, Dirk Scheele<sup>1,5</sup>

## Affiliations:

<sup>1</sup> Division of Medical Psychology, Department of Psychiatry and Psychotherapy, University Hospital Bonn, 53105 Bonn, Germany

<sup>2</sup> Institute for Clinical Chemistry and Clinical Pharmacology, University of Bonn, 53105 Bonn, Germany

<sup>3</sup> Department of Neurobiology and Behavior, University of California, Irvine, CA, 92697-3800, USA

<sup>4</sup> Department of Psychiatry and Psychotherapy, University Hospital Bonn, 53105 Bonn, Germany

<sup>5</sup> Department of Psychiatry, School of Medicine & Health Sciences, University of Oldenburg, 26129 Oldenburg

<sup>6</sup> Research Center Neurosensory Science, University of Oldenburg, 26129 Oldenburg

## Corresponding authors:

Marie Coenjaerts  
Department of Psychiatry and Psychotherapy  
University Hospital Bonn  
Venusberg-Campus 1  
53127 Bonn, Germany  
Tel: +49 228 287-19704  
E-mail: m.coenjaerts@mail.de

Dirk Scheele  
Department of Psychiatry and Psychotherapy  
University Hospital Bonn  
Venusberg-Campus 1  
53127 Bonn, Germany  
Tel: +49-(0)441-9615-1508  
E-mail: dirk-scheele@gmx.de

Article Type: Research Article

Subject Area: Neuroscience

Keywords: episodic memory, estradiol, hippocampus, oxytocin, sex differences

**Abstract:**

Considerable evidence supports sex differences in episodic memory, which may translate to heightened vulnerability to stress- and trauma-related disorders in women. The hormones estradiol and oxytocin both affect episodic memory, but possible underlying hormonal interactions have not been systemically tested in humans. To this end, healthy women (n = 111) and men (n = 115) received estradiol gel (2 mg) or placebo before the administration of intranasal oxytocin (24 IU) or placebo in a randomized, placebo-controlled, parallel-group functional magnetic resonance imaging (fMRI) study. In the fMRI session, participants viewed positive, neutral, and negative scenes. A surprise recognition task was conducted three days later. Under placebo, women showed a significantly better recognition memory and increased hippocampal responses to subsequently remembered items independent of the emotional valence compared to men. The separate treatments with either hormone significantly diminished this mnemonic sex difference and reversed the hippocampal activation pattern. However, the combined treatments led to a memory performance comparable to that of the placebo group. Collectively, the results suggest that both hormones play a crucial role in modulating sex differences in episodic memory. Furthermore, possible antagonistic interactions between estradiol and oxytocin could explain previously observed opposing hormonal effects in women and men.

## Introduction

Sex differences in memory have been reported repeatedly<sup>[1-3]</sup> and may contribute to the higher prevalence of stress- and trauma-related disorders in women.<sup>[4]</sup> Women tend to outperform men in episodic memory functions,<sup>[1,3,5,6]</sup> including autobiographical and recognition memory,<sup>[7,8]</sup> while there appears to be an advantage for spatial-based memory tasks in men.<sup>[5]</sup> Moreover, compared with men, women show enhanced memory for emotional stimuli.<sup>[9]</sup> Emotional hypermnnesia is partially mediated through activation of the amygdala<sup>[10,11]</sup> and imaging studies revealed a sex-related hemispheric lateralization of the amygdala in response to emotional stimuli: right amygdala activation while viewing emotional stimuli is more significantly related to subsequent memory for the images in men than women, whereas the reverse sex difference is evident for the left amygdala.<sup>[9,12-14]</sup>

Potential biological mechanisms explaining these sex differences include the effects of sex hormones on memory function and neuroplasticity.<sup>[1,15]</sup> In particular the role of estradiol (EST), as the most potent and prevalent circulating estrogen is discussed. As EST elicits effects on the memory consolidation in fear extinction learning, a behavioral process that models the psychopathology of PTSD and anxiety disorders,<sup>[4]</sup> the regulating function of mnemonic brain regions, such as the hippocampus, has been highlighted.<sup>[16]</sup> Previous studies in rodents and humans have shown that hippocampal function is sensitive to changes in estrogens that occur across the reproductive cycle, pregnancy, or ageing.<sup>[15,17,18]</sup> EST affects the dendritic spine density in the hippocampus<sup>[3,16]</sup> and enhances neuronal growth by promoting the formation of new synaptic connections.<sup>[19]</sup> Several rodent studies have shown that the infusion of EST before or immediately after a training improves memory performance.<sup>[16,20-24]</sup> Correlative studies of natural hormonal fluctuations during the menstrual cycle found that estrogen levels are associated with greater episodic memory performance, but estrogen exposure has not been consistently shown to correlate with memory parameters in all human studies.<sup>[3]</sup> For instance, some studies observed that higher levels of circulating EST correlate with better working memory performance,<sup>[25]</sup> whereas other studies

reported changes in neither working memory nor delayed recall across the menstrual cycle.<sup>[26]</sup> The mnemonic effects of EST might be task-dependent and vary with emotional valence and dose.<sup>[27,28]</sup> Despite the established sex differences in memory, there is little work directly comparing EST effects in women and men.<sup>[3]</sup>

Sex-specific behavioural and limbic effects have also been observed for the hypothalamic peptide oxytocin.<sup>[29,30]</sup> (OXT) Considering the peptide's prosocial and anxiolytic effects, together with its high tolerability, OXT has evolved as a potential candidate compound for treating various mental disorders.<sup>[31,32]</sup> Importantly, possible oxytocin-estradiol interactions have been proposed for various domains including migraine attacks<sup>[33]</sup> and social anxiety.<sup>[34]</sup> An intriguing notion is that both hormones may antagonistically interact in a way that yields opposing effects on limbic reactivity in women and men.<sup>[35]</sup> In rodents, OXT plays a critical role in mediating social memory, with OXT receptors in the hippocampus,<sup>[36]</sup> and amygdala<sup>[37]</sup> being necessary for social recognition. Findings regarding OXT effects on human memory encoding have been inconsistent, with reports ranging from memory impairment<sup>[38,39]</sup> to enhancement<sup>[40-42]</sup> via modulation of insula activity,<sup>[43]</sup> depending on inter-individual or contextual factors.<sup>[38,44]</sup> Evidence for interactions between OXT and EST derives from animal studies, showing extensive coexpression of EST receptor  $\beta$  in OXT neurons of the paraventricular nucleus of the hypothalamus<sup>[45]</sup> and combinatorial modulation of synaptic plasticity in the medial nucleus of the amygdala in male rats.<sup>[46]</sup> The EST receptor additionally binds in a dimerized form to the composite hormone response element of the OXT promoter gene and may thus induce the production of OXT.<sup>[47-49]</sup> In fact, orally administered EST induced an increase in OXT plasma levels in bulimic and healthy women.<sup>[50]</sup>

To date, no study has simultaneously probed the modulatory mnemonic effects of both hormones and possible interactions in women and men. Therefore, we conducted a randomized, placebo-controlled, parallel-group functional magnetic resonance imaging (fMRI) study to test the effects of EST, OXT, and their interaction on emotional memory and

to elucidate the neural mechanisms involved in mnemonic sex differences (**see Figure 1**). Healthy men and free-cycling women were scanned under four experimental conditions: 1. transdermal placebo gel and intranasal placebo (PLC<sub>tra</sub> & PLC<sub>int</sub>), 2. transdermal placebo and intranasal OXT (24 IU) (PLC<sub>tra</sub> & OXT<sub>int</sub>), 3. transdermal EST<sub>tra</sub> (2 mg) and intranasal placebo (EST<sub>tra</sub> & PLC<sub>int</sub>), and 4. transdermal EST and intranasal OXT (EST<sub>tra</sub> & OXT<sub>int</sub>). During fMRI, participants viewed positive, neutral and negative scenes. A surprise recognition task three days later was used to classify encoding trials as remembered or forgotten. We hypothesized that EST<sub>tra</sub> would increase recognition memory of emotional material and activity in the hippocampus and amygdala, in both sexes. We further expected that OXT<sub>int</sub> would have opposing effects in women and men (i.e., improved memory and increased insula responses in men compared to impairments and decreased insula activation in women) and that the sex-specific effects of OXT<sub>int</sub> would be reduced or even inverted in the combined treatment groups.

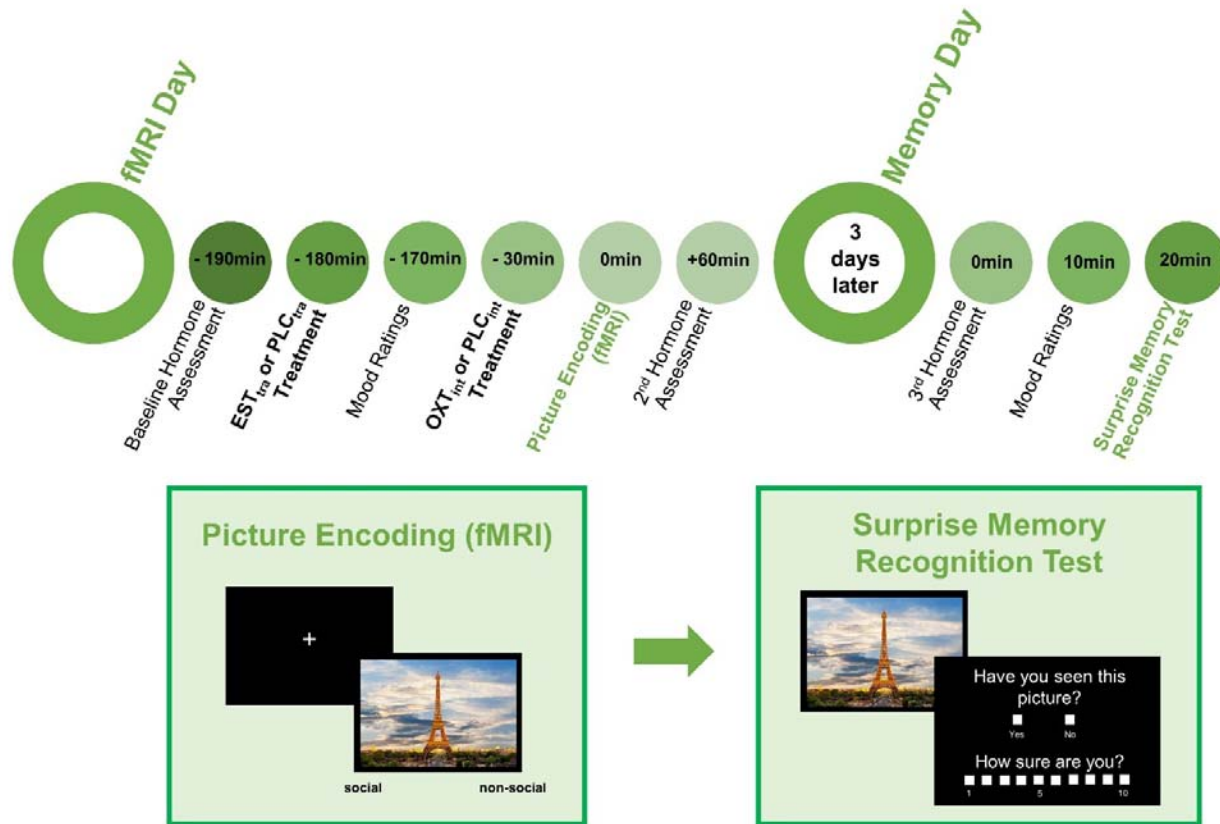

**Figure 1.** Study Design. The functional magnetic resonance imaging (fMRI) day commenced with gel administration. Nasal sprays were administered 3 hours after the gel and a high-resolution structural MRI scan was conducted 30 min after the nasal spray administration. Functional imaging data collection commenced 45 min after nasal spray treatment and included a picture encoding task. Participants viewed emotional and nonemotional scenes in a randomized order and had to press a button to indicate whether the picture's context was social (i.e., if a human person was shown). Blood samples were collected at baseline and immediately after the fMRI testing session (approx. 4.5 hours after the gel administration). Three days later a surprise memory recognition task was administered in a second testing session and a third blood sample was collected. The recognition task included the 120 pictures shown in the scanner and 60 new distractor pictures. Participants had to rate whether they had seen the picture in the MRI task (yes/no) and their level of confidence on a 10-point Likert scale.

## Methods

### Ethics and enrolment

The study was part of a larger project and was approved by the institutional review board of the Medical Faculty of the University of Bonn and carried out in accordance with the latest revision of the Declaration of Helsinki. The study was registered in the ClinicalTrials.gov database (Identifier: NCT04330677) and the data analyses were preregistered (<https://osf.io/hvknpp/>). The subjects were enrolled in the study after giving written informed consent, and they received a monetary reimbursement after completing the study.

### Subjects

In total, 295 subjects (160 women) were invited to a screening session prior to the testing session. The 246 subjects (122 women) who met the inclusion criteria (see below) were tested. The participants were randomly assigned to one of four experimental conditions: (1. PLC<sub>tra</sub> & PLC<sub>int</sub>; 2. PLC<sub>tra</sub> & OXT<sub>int</sub>; 3. EST<sub>tra</sub> & PLC<sub>int</sub>; 4. EST<sub>tra</sub> & OXT<sub>int</sub>). We had to exclude 20 participants from all analyses as the data of 11 subjects were not completely recorded due to technical errors and three participants did not finish the study. Additional six subjects were excluded due to hormonal (n = 4) or anatomical (n = 2) abnormalities, resulting in a sample of 226 participants (PLC<sub>tra</sub> & PLC<sub>int</sub>: 25 men, 26 women; PLC<sub>tra</sub> & OXT<sub>int</sub>: 33 men, 31 women; EST<sub>tra</sub> & PLC<sub>int</sub>: 32 men, 27 women; EST<sub>tra</sub> & OXT<sub>int</sub>: 25 men, 27 women). In accordance with our preregistered analysis of the data, we had to exclude additional 24 subjects, who remembered all or none of the stimuli in at least one valence category. Thus, our final sample for the neural and behavioural analyses included 202 subjects (PLC<sub>tra</sub> & PLC<sub>int</sub>: 19 men, 25 women; PLC<sub>tra</sub> & OXT<sub>int</sub>: 27 men, 29 women; EST<sub>tra</sub> & PLC<sub>int</sub>: 29 men, 25 women; EST<sub>tra</sub> & OXT<sub>int</sub>: 24 men, 24 women). For demographic and psychometric baseline characteristics see **Supplementary Table S7**.

## Screening session and exclusion criteria

Screenings of the participants were conducted prior to the test sessions. Subjects were free of current or past physical or psychiatric illnesses assessed by self-report and the Mini-International Neuropsychiatric Interview.<sup>[77]</sup> In addition, subjects were naive to prescription-strength psychoactive medication, and had not taken any over-the-counter psychoactive medications in the 4 weeks prior to the study. The participants were right-handed, nonsmoking and between 18 and 40 years old. Furthermore, the participants were asked to maintain their regular bed and waking times and to abstain from alcohol intake on the day of the experiment. Additional exclusion criteria were current pregnancy, MRI contraindications and the use of hormonal contraceptives. All women were tested in their early follicular phase of their menstrual cycle (days 1-6) as validated by blood assays obtained on the testing day. Female participants (n = 4) showing estradiol pre-treatment values larger than 300 pg/ml were excluded, because it can be assumed that they were not in the follicular phase of their menstrual cycle.<sup>[78]</sup>

## Experimental design

We used a randomized, double-blind, placebo-controlled parallel-group study design (see **Figure 1**). After a screening session, the subjects completed the fMRI testing session. Three days later a surprise memory recognition task was administered in a second testing session. The fMRI day commenced with the gel administration. In accordance with our pharmacokinetic pre-study (see **Supplementary Information [SI]**), the OXT<sub>int</sub> or placebo spray was administered 3 hours after gel administration. Functional imaging data collection commenced 45 min after nasal spray administration, because it was found to be the most effective dose-test interval for OXT<sub>int</sub>.<sup>[65]</sup> The imaging data collection included a high-resolution structural MRI scan and an emotional subsequent memory task. To validate the cycle phase and control for baseline differences in gonadal hormone levels, blood samples were collected at baseline, immediately after the fMRI testing session (approx. 4.5 hours after gel administration), and three days following the treatment.



## **Treatments**

### *Estradiol / placebo gel treatment*

On the fMRI testing day, the subjects received either EST<sub>tra</sub> gel (Estramon, 2 mg EST, Hexal AG, Holzkirchen, Germany) or placebo gel (2 mg ultrasonic gel), which was transdermally applied to the participants' backs. In line with a pharmacokinetic study,<sup>[79]</sup> a 2mg dose was chosen to reduce the possibility of side effects. The same dose has also been found to increase emotional vicarious reactivity in men when watching a distressed other.<sup>[80]</sup>

### *Intranasal oxytocin / placebo treatment*

Via a nasal spray, the subjects self-administered 24 International Units (IU) of synthetic OXT<sub>int</sub> (Sigma-Tau Industrie Farmaceutiche Riunite S.p.A., Rome, Italy) or placebo prior to the fMRI scanning in line with the standardization guidelines<sup>[81]</sup> and under supervision of a trained research assistant. There is compelling evidence that OXT<sub>int</sub> bypasses the blood-brain barrier and elevates OXT concentrations in the cerebrospinal fluid<sup>[82,83]</sup> and brain.<sup>[84]</sup> The placebo was equivalent to the OXT<sub>int</sub> solution without the peptide itself. The amount of administered substance was weighed and supplemented until 24 IU were reached. The puffs were balanced between the nostrils to allow the solution to be absorbed by the nasal epithelium and an interpuff interval of approx. 45 seconds was chosen.

## **Emotional subsequent memory task**

### *fMRI task*

During the fMRI, participants viewed a picture set (see SI) of negative (n = 40), neutral (n = 40), and positive (n = 40) scenes in a randomized order. The content of the pictures was either social (defined as the presence of a depicted human) or nonsocial, which were equally distributed across valence categories. As an attention control, the participants had to press a button, if the picture's context was social (i.e., if a human person was shown). The participants could choose their responses using an MRI-compatible response grip system (NordicNeuroLab AS, Bergen, Norway). The paradigm was written in Presentation code

(Neurobehavioral Systems, Albany, CA) and the stimuli were presented on a 32-inch MRI-compatible TFT LCD monitor (NordicNeuroLab, Bergen, Norway) placed at the rear of the magnet bore.

### *Surprise recognition task*

The participants performed a surprise memory recognition task three days after the MRI scan to classify pictures as remembered and nonremembered. The recognition task included the 120 pictures shown in the scanner and 60 new distractor pictures (matched for valence and arousal ratings, see **SI**). The participants had to rate whether they had seen the picture in the MRI task (yes/no) and their level of confidence on a 10-point Likert scale.

## **Data analysis**

### *fMRI data acquisition and analysis*

All fMRI data were acquired using a 3T Siemens TRIO MRI system (Siemens AG, Erlangen, Germany) with a Siemens 32-channel head coil. fMRI data were preprocessed and analysed using standard procedures in SPM12 software (Wellcome Trust Center for Neuroimaging; <http://www.fil.ion.ucl.ac.uk/spm>) implemented in MATLAB (MathWorks). Six conditions (valence (3) \* memory (2)) were modelled by a stick function convolved with a hemodynamic response function. Button presses were included as regressors of no interest. On the first level, task-specific effects were modelled. On the second level, a full factorial design with the between-subjects variables “OXT<sub>int</sub> treatment”, “EST<sub>tra</sub> treatment”, and “sex” was conducted. Based on previous findings<sup>[10,11,16,43]</sup>, analyses were conducted focusing on the anatomically defined amygdala, hippocampus and insula cortex based on the WFU PickAtlas as regions of interest (ROIs). The significance threshold for the ROI analyses was set to  $p < 0.05$ , familywise error-corrected for multiple comparisons based on the size of the ROI. In addition, an exploratory whole-brain analysis was performed (cluster defining threshold  $p < 0.001$ ; significance threshold  $p_{FWE} < 0.05$  at peak level). Parameter estimates of significant contrasts were extracted using MarsBaR (<https://www.nitrc.org/projects/marsbar>, RRID: SCR\_009605)

and further analyzed in SPSS 25 (IBM Corp., Armonk, NY). For further analyses and details see SI.

### *Memory performance*

Stimuli were classified as remembered if the picture was included in the emotional subsequent memory task and correctly identified in the recognition task. In accordance with our preregistration, the participants had to rate their confidence of the classification for an item as  $\geq 2$  on the 10-point Likert scale to be classified as remembered. The participants who remembered all or none of the stimuli in at least one valence category were excluded from the analysis ( $n = 24$ ), because a minimum of one trial was required in every valence category for the neural and behavioral model estimation. We calculated  $d'$  by subtracting the z-standardized false alarm rate from the z-standardized hit rate. The hit rate was the mean of the correctly identified stimuli used in the fMRI paradigm. The false alarm rate was the mean of the distractors in our recognition paradigm, which were incorrectly identified as seen by the subject, although they were not included in the fMRI task. When the hit rate or false alarm rate equals zero or one, the corresponding z-score would be  $-/\infty$ . Thus, we adjusted  $d'$  according to the loglinear method<sup>[85]</sup> by adding 0.5 to both the number of hits and the number of false alarms and adding 1 to both the number of signal trials and noise trials, before calculating the hit and false alarm rates.<sup>[86]</sup> A high  $d'$  indicated that the signal was easily detected.<sup>[87]</sup>

### **Statistical analyses**

Behavioural, neuroendocrine, and demographic data were analysed in SPSS 25 using standard procedures including analyses of variances (ANOVAs) and post-hoc  $t$ -tests. Post hoc  $t$ -tests were Bonferroni-corrected ( $p_{cor}$ ). In general, two-tailed  $p$  values  $< .05$  were considered significant, except for directional hypotheses, in which case one-tailed  $t$ -tests were calculated. If the assumption of sphericity was significantly violated, a Greenhouse-

Geisser correction was applied. As measures of effect sizes, partial eta-squared and Cohen's  $d$  were calculated. Furthermore, frequentist inference was complemented by computing Bayes factors (BFs) with default priors via JASP (version 0.14.1.0). For Bayesian  $t$ -tests,  $BF_{10}$  is reported. A  $BF_{10}$  larger than 1 can be interpreted as evidence in favour of the alternative hypothesis given the current data. For Bayesian ANOVAs,  $BF_{incl}$  (with fixed seed = 1) was calculated, which compares the performance of all models that include the effect to the performance of all the models that do not include the effect. Mixed-design ANOVAs with between-subjects variables "OXT<sub>int</sub> treatment" (OXT<sub>int</sub>, placebo nasal spray), "EST<sub>tra</sub> treatment" (EST<sub>tra</sub>, placebo gel) and "sex" (women, men) and the within-subject factors "valence" (negative, neutral, positive) and "sociality" (social, nonsocial) were conducted for the outcome "memory" ( $d'$ ). In a second and third model, either the factor "sociality" or the factor "valence" was aggregated. In a fourth model, both factors "valence" and "sociality" were aggregated to provide an overall  $d'$  that represented the general memory performance of the participants irrespective of valence and sociality. Changes in hormone concentrations were examined with mixed-design ANOVAs with the between-subject factors "OXT<sub>int</sub> treatment", "EST<sub>tra</sub> treatment", and "sex" and the within-subject variable "time" (baseline, after treatment, and three days after treatment; for OXT changes: baseline vs. after treatment). Furthermore, to explore the potential moderating effects of treatment-induced hormonal changes, the magnitude of the increases in hormone concentrations (levels of EST, OXT, testosterone, and progesterone after the fMRI session minus baseline) were considered covariates in the main analyses with significant behavioural ( $d'$ ) and neural outcomes (i.e., parameter estimates of significant contrasts of interests). **Results**

### **Neuroendocrine parameters**

At baseline, women had significantly higher EST concentrations ( $t_{(117.24)} = -5.70$ ,  $p < 0.001$ ,  $d = -0.80$ ;  $BF_{10} = 206050.22$ ), but lower testosterone ( $t_{(98.31)} = 27.09$ ,  $p < 0.001$ ,  $d = 3.89$ ;  $BF_{10} = 9.96 \times 10^{64}$ ) and OXT levels ( $t_{(196)} = 2.75$ ,  $p < 0.01$ ,  $d = 0.39$ ;  $BF_{10} = 5.04$ ) than men. The progesterone baseline concentrations were comparable between the two sexes ( $t_{(98.72)} = -$

1.76,  $p = 0.08$ ,  $d = -0.25$ ;  $BF_{10} = 0.65$ ). Importantly, all baseline levels were comparable between treatment groups in women and men (all  $ps > 0.05$ ;  $BF_{10} < 1$ ).

The  $EST_{tra}$  administration significantly increased blood EST levels in both sexes (see **Figure 2 and Supplementary Table S4**; time \*  $EST_{tra}$  treatment:  $F_{(1,00, 182.64)} = 265.92$ ,  $p < 0.001$ ,  $\eta_p^2 = 0.60$ ;  $BF_{incl} = 1.14 * 10^{79}$ ), with women exhibiting a significantly larger increase than men (time \* sex \*  $EST_{tra}$  treatment:  $F_{(1,01, 182.645)} = 16.30$ ,  $p < 0.001$ ,  $\eta_p^2 = 0.08$ ;  $BF_{incl} = 742418.03$ ). There were no significant main or interaction effects of the  $OXT_{int}$  treatment on EST levels (all  $ps > 0.05$ ;  $BF_{10} < 0.2$ ), indicating that the  $OXT_{int}$  treatment did not modulate the EST increase.

As an additional control analysis, we used a median-dichotomization and excluded  $EST_{tra}$ -treated women with large EST increase. In this subsample, the treatment-induced increases in EST levels were comparable between women and men within the treatment groups (all  $ps > 0.05$ ;  $BF_{10} < 0.6$ ) and the main behavioral and neural analyses yielded a similar pattern of results (see **SI and Supplementary Figure S1**).

$OXT_{int}$  administration significantly increased blood oxytocin levels in both sexes (see **Figure 2 and Supplementary Table S5**; time \*  $OXT_{int}$  treatment:  $F_{(1,190)} = 215.77$ ,  $p < 0.001$ ,  $\eta_p^2 = 0.53$ ;  $BF_{incl} = 2.43 * 10^{31}$ ) with men exhibiting a nonsignificantly larger increase than women (time \* sex \*  $OXT_{int}$  treatment:  $F_{(1, 190)} = 3.42$ ,  $p = 0.07$ ,  $\eta_p^2 = 0.02$ ;  $BF_{incl} = 1.00$ ). There were no significant main or interaction effects of the  $EST_{tra}$  treatment on the OXT levels (all  $ps > 0.05$ ;  $BF_{10} < 0.4$ ), indicating that the  $EST_{tra}$  treatment did not modulate the OXT increase.

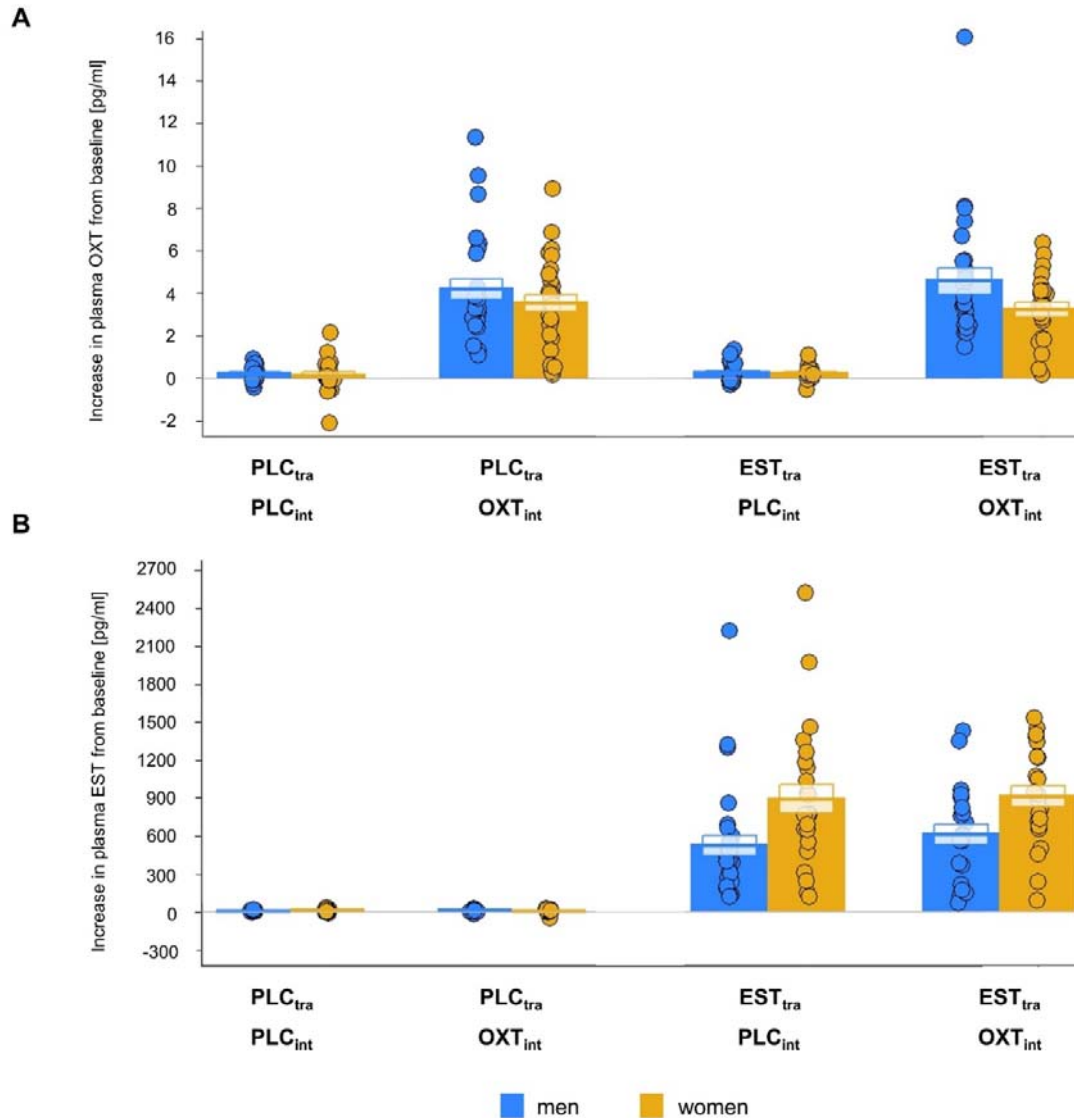

**Figure 2.** Treatment-induced changes (immediately after fMRI session minus baseline) in oxytocin and estradiol plasma levels. **A** The administration of 24 international units (IU) of intranasal (OXT<sub>int</sub>) induced a significant increase in blood oxytocin levels in both sexes. There was no significant interaction with the estradiol treatment. **B** The transdermal administration of 2 mg estradiol (EST<sub>tra</sub>) significantly elevated blood estradiol levels in both sexes. EST<sub>tra</sub> treatment induced a significantly stronger increase in women than in men, but there was no significant interaction with oxytocin treatment. PLC<sub>tra</sub> = transdermal placebo gel; PLC<sub>int</sub> = intranasal placebo; OXT<sub>int</sub> = intranasal oxytocin; EST<sub>tra</sub> = transdermal estradiol.

To examine whether the changes in OXT<sub>int</sub> and EST<sub>tra</sub> levels moderated behavioural and neural treatment effects, we included the hormonal changes (after treatment minus baseline) as separate covariates in the analyses and all sex \* treatment interactions remained significant. Furthermore, the treatments did not significantly alter the participants' mood (see **SI** and **Supplementary Table S6**).

### **Behavioural results**

Recognition memory was significantly better with emotional than neutral items (main effect valence:  $F_{(2,388)} = 13.18$ ,  $p < 0.001$ ,  $\eta_p^2 = 0.06$ ;  $BF_{incl} = 3054.02$ ) and with social than nonsocial stimuli (main effect of sociality:  $F_{(1,194)} = 7.59$ ,  $p < 0.01$ ,  $\eta_p^2 = 0.04$ ;  $BF_{incl} = 5.29$ ). However, there were no significant interactions between these factors (valence and sociality) and sex or treatments ( $BF_{incl} < 0.4$ ). Thus, the following analyses are based on  $d'$  averaged across valences and sociality.

#### *Behavioural results: sex differences*

Sex differences in recognition memory were significantly altered by both EST<sub>tra</sub> and OXT<sub>int</sub> treatments (significant three-way interaction: sex \* EST<sub>tra</sub> treatment \* OXT<sub>int</sub> treatment:  $F_{(1,194)} = 6.96$ ,  $p < 0.01$ ,  $\eta_p^2 = 0.04$ ;  $BF_{incl} = 5.55$ ; see **Figure 3** and **Supplementary Table S1**). Under placebo (PLC<sub>tra</sub> & PLC<sub>int</sub>), women showed significantly better memory performance than men ( $t_{(42)} = -2.96$ ,  $p < 0.01$  [ $p_{cor} = 0.02$ ],  $d = -0.90$ ;  $BF_{10} = 8.31$ ), but there were no significant sex differences in the EST<sub>tra</sub> & PLC<sub>int</sub> group ( $t_{(52)} = -0.32$ ,  $p = 0.75$ ,  $d = -0.09$ ;  $BF_{10} = 0.29$ ) or the PLC<sub>tra</sub> & OXT<sub>int</sub> group ( $t_{(54)} = 0.21$ ,  $p = 0.83$ ,  $d = 0.06$ ;  $BF_{10} = 0.28$ ). After the combined treatment (EST<sub>tra</sub> & OXT<sub>int</sub>), a trend similar to that observed in the placebo group was evident (women > men;  $t_{(46)} = -1.87$ ,  $p = 0.07$  [ $p_{cor} = 0.28$ ],  $d = -0.54$ ;  $BF_{10} = 1.16$ ). Thus, the Bayes factors indicated moderate evidence for sex differences under placebo, moderate evidence for the absence of sex differences after single treatments and an inconclusive sex effect in the combined group.

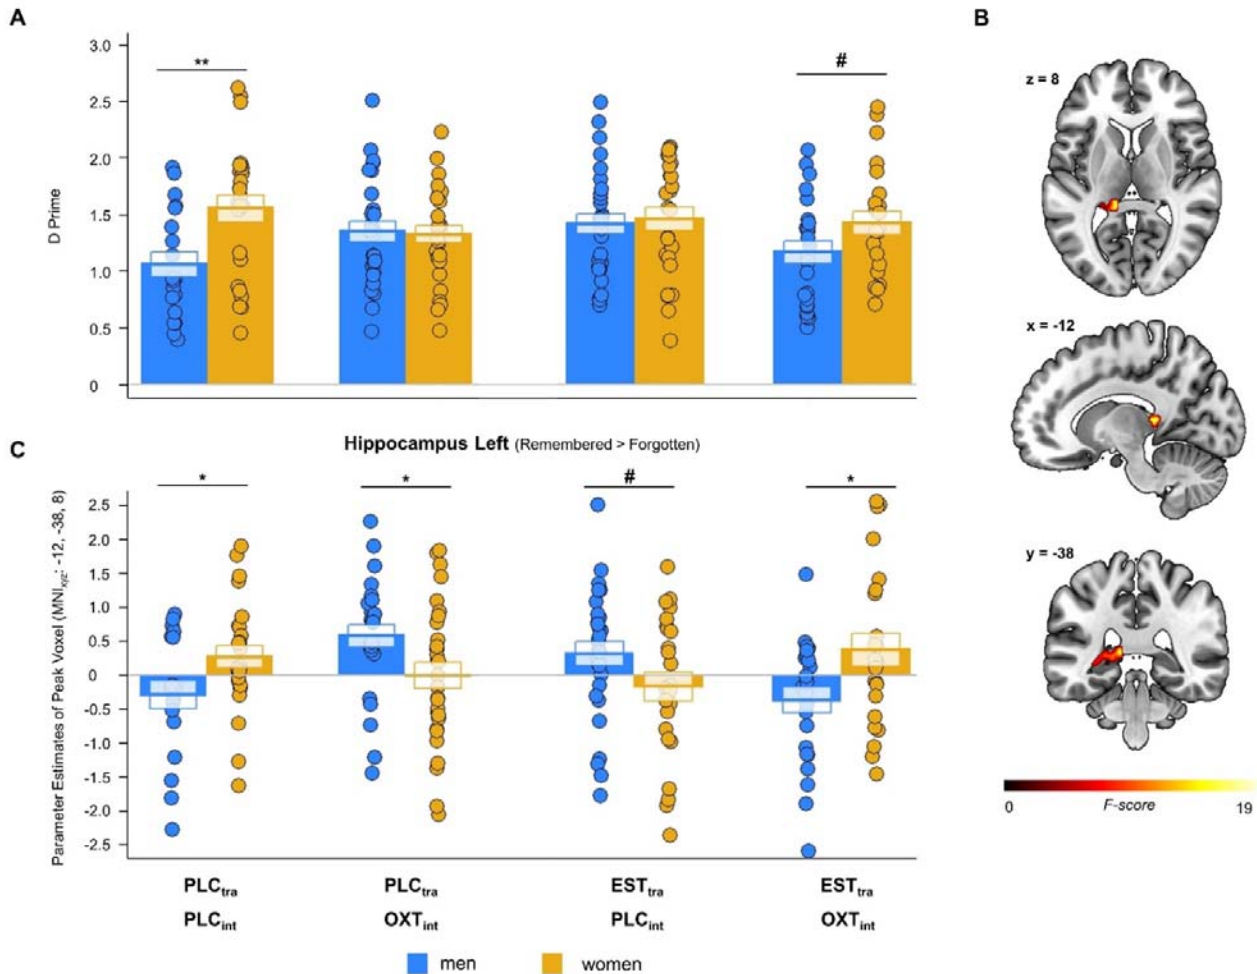

**Figure 3.** Treatment effects on mnemonic and hippocampal sex differences. **A** Following placebo administration, women showed a significantly better memory performance ( $d'$ ) than men, but there were no significant sex differences after single transdermal estradiol (EST<sub>tra</sub>) or intranasal oxytocin (OXT<sub>int</sub>) treatment. After the combined treatment, a trend similar to that observed in the placebo group was evident. **B** We observed a significant three-way interaction of sex, OXT<sub>int</sub>, and EST<sub>tra</sub> treatment in the left hippocampus responses to remembered compared to forgotten stimuli (MNI peak coordinates [x, y, z]: -12, -38, 8). **C** Further analyses of the parameter estimates for the left hippocampal responses revealed a similar pattern as that observed with memory performance. Women exhibited stronger left hippocampal responses to remembered items compared to forgotten items than men under placebo. This sex difference was reversed after either EST<sub>tra</sub> or OXT treatment. Intriguingly, the same pattern as that observed in the placebo group was again evident in the combined treatment group. PLC<sub>tra</sub> = transdermal placebo gel; PLC<sub>int</sub> = intranasal placebo; OXT<sub>int</sub> = intranasal oxytocin; EST<sub>tra</sub> = transdermal estradiol. # $p < 0.1$ , \* $p < 0.05$ , \*\* $p < 0.01$ .



### *Behavioural results: treatment effects*

To disentangle the observed three-way interaction, we examined the treatment effects separately for both sexes. We found a significant interaction between the OXT<sub>int</sub> and EST<sub>tra</sub> treatments in men ( $F_{(1,95)} = 7.84$ ,  $p < 0.01$  [ $p_{cor} = 0.01$ ],  $\eta_p^2 = 0.08$ ;  $BF_{incl} = 6.94$ ), but not in women ( $F_{(1,99)} = 0.93$ ,  $p = 0.34$ ,  $\eta_p^2 = 0.01$ ;  $BF_{incl} = 0.40$ ). In men, OXT<sub>int</sub> nonsignificantly improved recognition memory after PLC<sub>tra</sub> treatment (PLC<sub>tra</sub> & OXT<sub>int</sub> vs. PLC<sub>tra</sub> & PLC<sub>int</sub>:  $t_{(44)} = -2.01$ ,  $p = 0.03$  [ $p_{cor} = 0.1$ ],  $d = -0.6$ ;  $BF_{10} = 1.45$ ; one-tailed) and reduced performance after EST<sub>tra</sub> treatment (EST<sub>tra</sub> & OXT<sub>int</sub> vs. EST<sub>tra</sub> & PLC<sub>int</sub>:  $t_{(51)} = 1.95$ ,  $p = 0.06$  [ $p_{cor} = 0.23$ ],  $d = 0.54$ ;  $BF_{10} = 1.30$ ). Likewise, in men, EST<sub>tra</sub> treatment produced significantly better memory in participants who received PLC<sub>int</sub> (EST<sub>tra</sub> & PLC<sub>int</sub> vs. PLC<sub>tra</sub> & PLC<sub>int</sub>:  $t_{(46)} = -2.55$ ,  $p < 0.01$  [ $p_{cor} = 0.03$ ],  $d = -0.75$ ;  $BF_{10} = 3.75$ ; one-tailed) and an impairment in individuals who received OXT<sub>int</sub> (EST<sub>tra</sub> & OXT<sub>int</sub> vs. PLC<sub>tra</sub> & OXT<sub>int</sub>:  $t_{(49)} = 1.37$ ,  $p = 0.18$ ,  $d = 0.38$ ;  $BF_{10} = 0.60$ ). Together, the Bayes factors indicate moderate evidence for an EST<sub>tra</sub> \* OXT<sub>int</sub> interaction in men and moderate evidence for an EST<sub>tra</sub>-induced memory improvement in men who had received PLC<sub>int</sub>.

### **Neural results: task effects**

Across treatments and sexes, the remembered items compared to forgotten items induced activations in a wide network of brain areas (see **Supplementary Table S2**), including the bilateral hippocampus (left: Montreal Neurological Institute [MNI] peak coordinates [x, y, z]: -32, -18, -14,  $F_{(1,194)} = 28.81$ , on peak level  $p_{FWE} < 0.02$ ; right: MNI peak coordinates [x, y, z]: 20, -6, -14,  $F_{(1,194)} = 105.12$ , on peak level  $p_{FWE} < 0.001$ ). Furthermore, an emotional memory effect (i.e., [Emotional Remembered > Forgotten > Neutral Remembered > Forgotten]) was evident in the left and right amygdala (left: MNI peak coordinates [x, y, z]: -20, -6, -14,  $F_{(1,194)} = 18.12$ , on peak level  $p_{FWE} < 0.01$ ; right: MNI peak coordinates [x, y, z]: 22, -6, -12,  $F_{(1,194)} = 13.96$ , on peak level  $p_{FWE} = 0.02$ ), as well as the left hippocampus (MNI peak coordinates [x, y, z]: -18, -6, -14,  $F_{(1,194)} = 18.55$ , on peak level  $p_{FWE} < 0.01$ ) and the right insula (MNI peak coordinates [x,

$y, z]$ : 26, 22, -16,  $F_{(1,194)} = 18.85$ , on peak level  $p_{\text{FWE}} = 0.01$ ; for additional activations, see **Supplementary Table S3**).

### **Neural results: sex differences**

We observed a significant main effect of sex in the left amygdala responses to positive remembered stimuli compared to positive forgotten stimuli (MNI peak coordinates  $[x, y, z]$ : -28, -2, -24,  $F_{(1,204)} = 12.37$ , on peak level  $p_{\text{FWE}} = 0.03$ ; see **Figure 4**) and in the right amygdala responses to negative remembered stimuli compared to negative forgotten stimuli (MNI peak coordinates  $[x, y, z]$ : 28, 4, -16,  $F_{(1,205)} = 12.23$ , on peak level  $p_{\text{FWE}} = 0.03$ ), but there were no significant interactions between sex and either treatment type. Analyses of the extracted parameter estimates revealed that across treatments men exhibited significantly increased right amygdala responses to negative remembered stimuli relative to negative forgotten stimuli compared to women ( $t_{(200)} = 3.16$ ,  $p < 0.01$ ,  $d = 0.45$ ;  $\text{BF}_{10} = 15.17$ ). In contrast, women showed a stronger activation than men in response to positive remembered stimuli relative to positive forgotten stimuli in the left amygdala ( $t_{(200)} = -2.85$ ,  $p < 0.01$ ,  $d = -0.40$ ;  $\text{BF}_{10} = 6.50$ ).

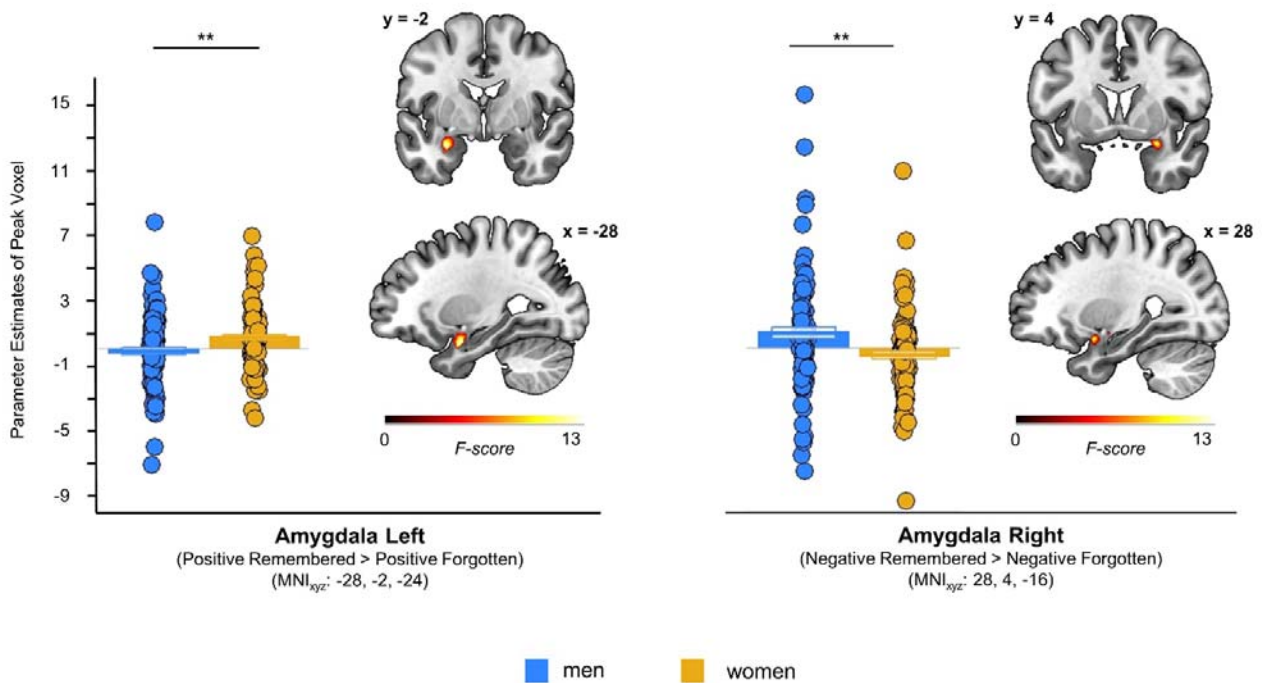

**Figure 4.** Sex-specific lateralization of amygdala activation. Significant main effects of sex emerged in left amygdala responses to positive remembered stimuli compared to positive forgotten stimuli (MNI peak coordinates [x, y, z]: -28, -2, -24) and for right amygdala responses to negative remembered stimuli compared to negative forgotten stimuli (MNI peak coordinates [x, y, z]: 28, 4, -16). Across treatments, analyses of the extracted parameter estimates showed that men exhibited significantly greater right amygdala responses to negative remembered stimuli relative to negative forgotten stimuli than women. However, the pattern in the left amygdala was reversed. Women showed a stronger activation than men in response to positive remembered stimuli compared to positive forgotten stimuli. There were no significant interactions between sex and either treatment type.  $**p < 0.01$ .

Furthermore, we found a significant three-way interaction of sex, OXT<sub>int</sub>, and EST<sub>tra</sub> treatment in the left hippocampus responses to remembered stimuli compared to forgotten stimuli (MNI peak coordinates [x, y, z]: -12, -38, 8,  $F_{(1,194)} = 17.80$ , on peak level  $p_{FWE} = 0.012$ ; see **Figure 3**). Further analyses of the extracted parameter estimates revealed that women exhibited nonsignificantly stronger hippocampal responses to remembered items than men under placebo (PLC<sub>tra</sub> & PLC<sub>int</sub>;  $t_{(42)} = -2.10$ ,  $p = 0.04$  [ $p_{cor} = 0.17$ ],  $d = -0.64$ ;  $BF_{10} = 1.68$ ). This sex difference was reversed (i.e., men > women) in both the EST<sub>tra</sub> & PLC<sub>int</sub> group ( $t_{(52)} = 1.77$ ,  $p = 0.08$ , [ $p_{cor} = 0.33$ ],  $d = 0.48$ ;  $BF_{10} = 0.99$ ) and the PLC<sub>tra</sub> & OXT<sub>int</sub> group ( $t_{(54)} = 2.25$ ,  $p = 0.03$  [ $p_{cor} = 0.11$ ],  $d = 0.60$ ;  $BF_{10} = 2.13$ ). Interestingly, the same pattern observed in the placebo group was again evident in the combined treatment group (women > men;  $t_{(46)} = -2.42$ ,  $p = 0.02$  [ $p_{cor} = 0.08$ ],  $d = -0.7$ ;  $BF_{10} = 2.93$ ). Notably, a similar sex \* EST<sub>tra</sub> treatment \* OXT<sub>int</sub> treatment interaction emerged for the emotional memory effect in the left hippocampus ([Emotional Remembered > Forgotten > Neutral Remembered > Forgotten]; MNI peak coordinates [x, y, z]: -14, -40, 10,  $F_{(1,194)} = 16.66$ , on peak level  $p_{FWE} = 0.02$ ; see Supplement). We did not observe a significant three-way interaction of sex, OXT<sub>int</sub>, and EST<sub>tra</sub> treatment in the insula.

### Neural results: treatment effects

To disentangle the observed three-way interaction in the left hippocampus, we examined the parameter estimates for left hippocampal responses to remembered items compared to forgotten items separately for the both sexes. We found a significant interaction between the OXT<sub>int</sub> and EST<sub>tra</sub> treatments in men ( $F_{(1,95)} = 17.30$ ,  $p < 0.001$  [ $p_{cor} < 0.001$ ],  $\eta_p^2 = 0.15$ ;  $BF_{incl} = 316.43$ ), but not in women ( $F_{(1,99)} = 3.92$ ,  $p = 0.05$  [ $p_{cor} = 0.10$ ],  $\eta_p^2 = 0.04$ ;  $BF_{incl} = 1.38$ ). OXT<sub>int</sub> significantly increased the hippocampal response to remembered stimuli compared to forgotten stimuli in men who had received PLC<sub>tra</sub> (PLC<sub>tra</sub> & OXT<sub>int</sub> vs. PLC<sub>tra</sub> & PLC<sub>int</sub>:  $t_{(44)} = -3.30$ ,  $p < 0.01$  [ $p_{cor} < 0.01$ ],  $d = -0.99$ ;  $BF_{10} = 18.29$ ), but had the opposite effect in men after EST<sub>tra</sub> treatment (EST<sub>tra</sub> & OXT<sub>int</sub> vs. EST<sub>tra</sub> & PLC<sub>int</sub>:  $t_{(51)} = 2.61$ ,  $p = 0.01$  [ $p_{cor} = 0.04$ ],  $d = 0.72$ ;  $BF_{10} = 4.24$ ). Likewise, EST<sub>tra</sub> nonsignificantly increased hippocampal activation in men after PLC<sub>int</sub> (EST<sub>tra</sub> & PLC<sub>int</sub> vs. PLC<sub>tra</sub> & PLC<sub>int</sub>:  $t_{(46)} = -2.17$ ,  $p = 0.02$  [ $p_{cor} = 0.07$ ],  $d = -0.64$ ;

$BF_{10} = 1.88$ ; one-tailed) and produced significant effects in the opposite direction when combined with  $OXT_{int}$  treatment ( $EST_{tra}$  &  $OXT_{int}$  vs.  $PLC_{tra}$  &  $OXT_{int}$ :  $t_{(49)} = 3.80$ ,  $p < 0.001$  [ $p_{cor} < 0.001$ ],  $d = 1.07$ ;  $BF_{10} = 67.05$ ). Thus, again, the Bayes factors indicated strong evidence for an  $EST_{tra} * OXT_{int}$  interaction in men. Furthermore, there was moderate-to-strong evidence for opposing effects of  $OXT_{int}$  on hippocampal activation depending on  $EST_{tra}$  pretreatment and strong evidence for an  $EST_{tra}$ -induced decrease when combined with  $OXT_{int}$ .

## Discussion

The goal of the current study was to elucidate the effects of  $EST_{tra}$  and  $OXT_{int}$  and their interaction on episodic memory in healthy women and men. Our results revealed that women showed better recognition memory than men and increased hippocampal responses to subsequently remembered items irrespective of emotional valence. Separate treatments with either  $EST_{tra}$  or  $OXT_{int}$  significantly diminished this mnemonic sex difference and reversed the hippocampal activation pattern. However, the combined treatments led to a memory performance comparable to that of the placebo group, indicating an antagonistic effect of the two hormones at the administered doses. This pattern was also evident in a subsample with comparable treatment-induced EST increases in women and men. Given significant memory differences between the sexes in the placebo group, our data are consistent with the reported advantage of women in episodic memory,<sup>[1,3,5-8]</sup> which may contribute to the higher prevalence of stress- and trauma-related disorders in women. The preponderance of studies with exclusively female samples to examine the effects of the “female” sex hormone  $EST_{tra}$  and exclusively male samples in the case of  $OXT_{int}$  might have obfuscated the contribution of these hormones to sex differences in episodic memory.<sup>[16,51]</sup> Our study included both sexes and indicated an essential role of  $EST_{tra}$  and  $OXT_{int}$  as modulators of episodic memory in women and men.

In men, separate treatment with either  $EST_{tra}$  or  $OXT_{int}$  increased hippocampal activation and improved episodic memory. These findings are in line with previous studies showing that EST and OXT receptor signalling in the hippocampus regulate neuronal excitability, synaptic plasticity, and memory formation in male mice and rats.<sup>[52,53]</sup> For instance, EST induced spinogenesis in the hippocampus<sup>[54]</sup> and improved long-term memory following pretraining administration of  $EST_{tra}$  in male rats.<sup>[55,56]</sup> Likewise, OXT has been found to enhance cortical information transfer in the hippocampus irrespective of sex by exciting fast-spiking interneurons.<sup>[57]</sup> Furthermore, conditional deletion of OXT receptors in the hippocampus of male mice impaired the persistence of long-term social recognition memory,<sup>[58]</sup> and  $OXT_{int}$

rescued recognition memory and hippocampal long-term potentiation in stressed male rats.<sup>[59]</sup> We are not aware of any study probing the effects of exogenous  $EST_{tra}$  on memory performance in men, but several studies found improved recognition memory after  $OXT_{int}$  administration<sup>[40,41,60]</sup> (but also see <sup>[38,61]</sup>). We did not observe a selective facilitation of social stimuli or valence-dependent effects on insula reactivity, which could be related to the use of scenes with a human person as social items instead of faces and may reflect differences between recognition and recall memory.<sup>[43]</sup> Selective  $OXT_{int}$  effects in men, but not in women, have been previously observed for hippocampal responses to cooperative interactions<sup>[29]</sup> and chemosensory stress signals.<sup>[62]</sup> Furthermore,  $OXT_{int}$  appears to modulate hippocampus activation as a function of social salience, with the peptide decreasing hippocampal responses to an unfamiliar child, but not the own child in fathers.<sup>[63]</sup> Intriguingly, a single  $EST_{tra}$  treatment produced similar effects as  $OXT$ , but the  $OXT_{int}$ -induced increase in hippocampal activation was absent after  $EST_{tra}$  pretreatment. One possible explanation for this pattern of results is that  $EST_{tra}$  may have increased  $OXT$  receptor binding,<sup>[64]</sup> thereby mirroring the opposing effects previously observed for higher  $OXT_{int}$  doses in men.<sup>[65]</sup>  $EST_{tra}$  treatment did not trigger the release of endogenous  $OXT_{int}$  4.5 hours after gel administration, but there is preliminary evidence that  $EST_{tra}$ -induced  $OXT$  secretion would be most pronounced 18-36 hours later.<sup>[50]</sup> While we detected no significant difference between treatment groups in  $EST$  and  $OXT$  concentrations before the surprise recognition task 3 days after the fMRI session, elevated hormone levels may have influenced both encoding and early consolidation. Interestingly,  $EST_{tra} * OXT_{int}$  interactions may have contributed to the modulatory effects of hormonal contraception<sup>[66]</sup> and to the sex-specific effects of  $OXT_{int}$  that have been found in various domains, including fear-related amygdala reactivity<sup>[35]</sup>, the perception of competition,<sup>[67]</sup> moral decision-making,<sup>[30]</sup> and emotional responses to couple conflict.<sup>[68]</sup>

The absence of a significant  $EST_{tra}$  effect in women may reflect sex-specific dose-dependent mechanisms. The  $EST_{tra}$  treatment produced a significantly larger increase in peripheral  $EST$

concentrations in women than in men, yielding concentrations comparable to the EST levels in pregnancy.<sup>[69]</sup> Thus, the nonsignificant decrease in hippocampal activation is consistent with the notion of an inverted U-shaped dose-response function of EST<sub>tra</sub> in women.<sup>[27]</sup> EST<sub>tra</sub> levels within physiological ranges have been found to stimulate hippocampal activity, while levels within supraphysiological ranges can have the opposite effect. While low levels of EST were shown to activate the high-affinity receptor ER $\alpha$ , thus inducing synaptogenesis and enhancing blood oxygen level-dependent (BOLD) responses, high levels of EST also activated the low-affinity receptor ER $\beta$ , which in turn reduced synaptogenesis.<sup>[70,71]</sup> As such, the EST<sub>tra</sub>-enhanced anxiolytic action of OXT<sub>int</sub> previously observed in female mice may also be dose-dependent.<sup>[48]</sup> In contrast, sex-specific effects of OXT<sub>int</sub> on the amygdala response to fearful faces in women have been reported across a range of doses,<sup>[35]</sup> but OXT<sub>int</sub> effects on episodic memory have not been systematically tested in women. Intranasal OXT administered after acquisition improved recognition memory of faces in a combined sample of 36 women and men,<sup>[42]</sup> suggesting that the peptide's mnemonic effect may differ between acquisition and encoding or may be modulated by the stimulus material.

Interestingly, we found the expected memory advantage for emotional material and replicated the sex-specific lateralization of amygdala recruitment,<sup>[9,12-14]</sup> but there was no significant interaction of the treatments for the emotional memory effect in the amygdala. The effects of EST<sub>tra</sub> and OXT<sub>int</sub> on amygdala activation have been well established in animal studies,<sup>[46,72,73]</sup> but translation to humans may depend on methodological details such as task design and stimulus material. Furthermore, while the availability of aromatase, the enzyme that catalyzes testosterone to estradiol, is comparable in the amygdala between women and men, higher aromatase availability was associated with lower memory performance in men, but not women.<sup>[74]</sup> Thus, the effects of and interactions with other gonadal steroids should be taken into consideration. For instance, testosterone treatment shifted amygdala lateralization towards the right hemisphere in transgender boys<sup>[75]</sup> and exogenous progesterone increased amygdala responses to emotional faces in women.<sup>[76]</sup>



The findings of the present study need to be considered in the context of the following limitations. In both sexes, supraphysiological estradiol levels were induced due to the exogenous estradiol administration. It is conceivable that interactions between  $OXT_{int}$  and  $EST_{tra}$  in women would be evident at physiological EST levels occurring during the menstrual cycle. Future studies should employ different doses and postlearning administration protocols to further delineate the sex-specific memory effects of  $EST_{tra}$  and  $OXT_{int}$ . Additional clinical trials using long-term applications are needed to further disentangle the hormones' impact on memory formation and to deduce possible direct implications for the development of several psychiatric disorders, such as PTSD.

Collectively, our results provide evidence that  $EST_{tra}$  and  $OXT_{int}$  modulate episodic memory and hippocampal functioning in men. Concomitant pharmacological enhancement of  $EST_{tra}$  and  $OXT_{int}$  signalling produced antagonistic effects that may contribute to the previously observed sex-specific hormonal effects in various domains. Our findings support the increasingly recognized notion that it is vital to consider sex differences in pharmacological clinical trials.

## **Acknowledgements**

The authors thank Mitjan Morr and Jana Lieberz for helpful discussions about our manuscript.

## **Study approval statement**

This study protocol was reviewed and approved by the institutional review board of the medical faculty of the University of Bonn [Approval number: 213/16]. Written informed consent was obtained from all participants included in this study.

## **Competing interests**

The authors report no competing biomedical financial interests or personal affiliations in connection with the content of this manuscript.

## **Role of funding source**

R.H. and D.S. are supported by a German Research Foundation (DFG) grant (HU 1302/11-1 and SCHE 1913/5-1). The DFG had no further role in study design; in the collection, analysis and interpretation of data; in the writing of the report; and in the decision to submit the paper for publication.

## **Author Contributions**

M.C., and D.S. designed the experiment; M.C., I.T. and B.A. conducted the experiments; M.C., B.S-W. and D.S. analysed the data. M.C. and D.S. wrote the manuscript. All authors read and approved the manuscript in its current version.

## **Data availability statement**

A preprint of this article is published at the BioRxiv preprint server (<https://doi.org/10.1101/2021.11.22.469500>). The data that support the findings of the present study are openly available in the repository of the Open Science Foundation at

<https://osf.io/hvknf/> (doi: 10.17605/OSF.IO/HVKNP). The unthresholded statistical maps of the fMRI results can be accessed at <https://neurovault.org/collections/FBHLKJX/>. The code that supports the findings of the present study is openly available in the repository of the Open Science Foundation at <https://osf.io/hvknf/> (doi: 10.17605/OSF.IO/HVKNP).

## 7. References

- [1] Andreano, J. M., & Cahill, L. (2009). Sex influences on the neurobiology of learning and memory. *Learning & memory*, 16(4), 248-266. DOI: <https://doi.org/10.1101/lm.918309>
- [2] Cahill, L. (2003). Sex-related influences on the neurobiology of emotionally influenced memory. *Annals of the New York Academy of Sciences*, 985(1), 163-173. DOI: <https://doi.org/10.1111/j.1749-6632.2003.tb07080.x>
- [3] Loprinzi, P. D., & Frith, E. (2018). The role of sex in memory function: considerations and recommendations in the context of exercise. *Journal of clinical medicine*, 7(6), 132. DOI: <https://doi.org/10.3390/jcm7060132>
- [4] Cover, K. K., Maeng, L. Y., Lebrón-Milad, K., & Milad, M. (2014). Mechanisms of estradiol in fear circuitry: implications for sex differences in psychopathology. *Translational psychiatry*, 4(8), e422-e422. DOI: <https://doi.org/10.1038/tp.2014.67>
- [5] Herlitz, A., Nilsson, L. G., & Bäckman, L. (1997). Gender differences in episodic memory. *Memory & cognition*, 25(6), 801-811. DOI: <https://doi.org/10.3758/BF03211324>
- [6] Herlitz, A., & Yonker, J. E. (2002). Sex differences in episodic memory: The influence of intelligence. *Journal of Clinical and Experimental Neuropsychology*, 24(1), 107-114. DOI: <https://doi.org/10.1076/jcen.24.1.107.970>
- [7] Fuentes, A., & Desrocher, M. (2012). Autobiographical memory in emerging adulthood: Relationship with self-concept clarity. *Journal of Adult Development*, 19(1), 28-39. DOI: <https://doi.org/10.1007/s10804-011-9131-1>
- [8] Heisz, J. J., Pottruff, M. M., & Shore, D. I. (2013). Females scan more than males: a potential mechanism for sex differences in recognition memory. *Psychological science*, 24(7), 1157-1163. DOI: <https://doi.org/10.1177/0956797612468281>
- [9] Canli, T., Desmond, J. E., Zhao, Z., & Gabrieli, J. D. (2002). Sex differences in the neural basis of emotional memories. *Proceedings of the National Academy of Sciences*, 99(16), 10789-10794. DOI: <https://doi.org/10.1073/pnas.162356599>
- [10] Aikins, D. E., Anticevic, A., Kiehl, K. A., & Krystal, J. H. (2010). Sex-related differences in amygdala activity influences immediate memory. *Neuroreport*, 21(4), 273-276. DOI: <https://doi.org/10.1097/WNR.0b013e328335b3f9>
- [11] Hamann, S. B., Ely, T. D., Grafton, S. T., & Kilts, C. D. (1999). Amygdala activity related to enhanced memory for pleasant and aversive stimuli. *Nature neuroscience*, 2(3), 289-293. DOI: <https://doi.org/10.1038/6404>
- [12] Cahill, L., Haier, R. J., White, N. S., Fallon, J., Kilpatrick, L., Lawrence, C., Potkin, S. G. & Alkire, M. T. (2001). Sex-related difference in amygdala activity during emotionally influenced memory storage. *Neurobiology of learning and memory*, 75(1), 1-9. DOI: <https://doi.org/10.1006/nlme.2000.3999>
- [13] Cahill, L. (2006). Why sex matters for neuroscience. *Nature reviews neuroscience*, 7(6), 477-484. DOI: <https://doi.org/10.1038/nrn1909>
- [14] Canli, T., Zhao, Z., Brewer, J., Gabrieli, J. D., & Cahill, L. (2000). Event-related activation in the human amygdala associates with later memory for individual emotional experience. *Journal of neuroscience*, 20(19), RC99-RC99. DOI: <https://doi.org/10.1523/JNEUROSCI.20-19-j0004.2000>
- [15] Duarte-Guterman, P., Yagi, S., Chow, C., & Galea, L. A. (2015). Hippocampal learning, memory, and neurogenesis: Effects of sex and estrogens across the lifespan in adults. *Hormones and behavior*, 74, 37-52. DOI: <https://doi.org/10.1016/j.yhbeh.2015.05.024>
- [16] Taxier, L. R., Gross, K. S., & Frick, K. M. (2020). Oestradiol as a neuromodulator of learning and memory. *Nature Reviews Neuroscience*, 21(10), 535-550. DOI: <https://doi.org/10.1038/s41583-020-0362-7>
- [17] Daniel, J. M. (2013). Estrogens, estrogen receptors, and female cognitive aging: the impact of timing. *Hormones and behavior*, 63(2), 231-237.

- DOI: <https://doi.org/10.1016/j.yhbeh.2012.05.003>
- [18] Pawluski, J. L., Brummelte, S., Barha, C. K., Crozier, T. M., & Galea, L. A. (2009). Effects of steroid hormones on neurogenesis in the hippocampus of the adult female rodent during the estrous cycle, pregnancy, lactation and aging. *Frontiers in neuroendocrinology*, 30(3), 343-357. DOI: <https://doi.org/10.1016/j.yfrne.2009.03.007>
- [19] Cooke, B. M., & Woolley, C. S. (2005). Gonadal hormone modulation of dendrites in the mammalian CNS. *Journal of neurobiology*, 64(1), 34-46. DOI: <https://doi.org/10.1002/neu.20143>
- [20] Boulware, M. I., Heisler, J. D., & Frick, K. M. (2013). The memory-enhancing effects of hippocampal estrogen receptor activation involve metabotropic glutamate receptor signaling. *Journal of Neuroscience*, 33(38), 15184-15194. DOI: <https://doi.org/10.1523/JNEUROSCI.1716-13.2013>
- [21] Fernandez, S. M., Lewis, M. C., Pechenino, A. S., Harburger, L. L., Orr, P. T., Gresack, J. E., Schafe, G. E. & Frick, K. M. (2008). Estradiol-induced enhancement of object memory consolidation involves hippocampal extracellular signal-regulated kinase activation and membrane-bound estrogen receptors. *Journal of Neuroscience*, 28(35), 8660-8667. DOI: <https://doi.org/10.1523/JNEUROSCI.1968-08.2008>
- [22] Luine, V. N., Jacome, L. F., & MacLusky, N. J. (2003). Rapid enhancement of visual and place memory by estrogens in rats. *Endocrinology*, 144(7), 2836-2844. DOI: <https://doi.org/10.1210/en.2003-0004>
- [23] Pereira, L. M., Bastos, C. P., de Souza, J. M., Ribeiro, F. M., & Pereira, G. S. (2014). Estradiol enhances object recognition memory in Swiss female mice by activating hippocampal estrogen receptor  $\alpha$ . *Neurobiology of learning and memory*, 114, 1-9. DOI: <https://doi.org/10.1016/j.nlm.2014.04.001>
- [24] Tuscher, J. J., Taxier, L. R., Schalk, J. C., Haertel, J. M., & Frick, K. M. (2019). Chemogenetic suppression of medial prefrontal-dorsal hippocampal interactions prevents estrogenic enhancement of memory consolidation in female mice. *Eneuro*, 6(2). DOI: <https://doi.org/10.1523/ENEURO.0451-18.2019>
- [25] Hampson, E., & Morley, E. E. (2013). Estradiol concentrations and working memory performance in women of reproductive age. *Psychoneuroendocrinology*, 38(12), 2897-2904. DOI: <https://doi.org/10.1016/j.psyneuen.2013.07.020>
- [26] Mihalj, M., Drenjančević, I., Včev, A., Šumanovac, A., Čavka, A., Vladetić, M., & Gmajnić, R. (2014). Basic cognitive functions across the menstrual cycle in a controlled female cohort. *Med Glas (Zenica)*, 11(1), 177-185. PMID: 24496361.
- [27] Bayer, J., Gläscher, J., Finsterbusch, J., Schulte, L. H., & Sommer, T. (2018). Linear and inverted U-shaped dose-response functions describe estrogen effects on hippocampal activity in young women. *Nature communications*, 9(1), 1-12. DOI: <https://doi.org/10.1038/s41467-018-03679-x>
- [28] Luine, V. N. (2014). Estradiol and cognitive function: past, present and future. *Hormones and behavior*, 66(4), 602-618. DOI: <https://doi.org/10.1016/j.yhbeh.2014.08.011>
- [29] Rilling, J. K., DeMarco, A. C., Hackett, P. D., Chen, X., Gautam, P., Stair, S., Haroon, E., Thompson, R., Ditzen, B., Patel, R. & Pagnoni, G. (2014). Sex differences in the neural and behavioral response to intranasal oxytocin and vasopressin during human social interaction. *Psychoneuroendocrinology*, 39, 237-248. DOI: <https://doi.org/10.1016/j.psyneuen.2013.09.022>
- [30] Scheele, D., Striepens, N., Kendrick, K. M., Schwering, C., Noelle, J., Wille, A., Schläpfer, T. E., Maier, W. & Hurlmann, R. (2014). Opposing effects of oxytocin on moral judgment in males and females. *Human brain mapping*, 35(12), 6067-6076. DOI: <https://doi.org/10.1002/hbm.22605>
- [31] Meyer-Lindenberg, A., Domes, G., Kirsch, P., & Heinrichs, M. (2011). Oxytocin and vasopressin in the human brain: social neuropeptides for translational medicine. *Nature Reviews Neuroscience*, 12(9), 524-538. DOI: <https://doi.org/10.1038/nrn3044>
- [32] Heinrichs, M., von Dawans, B., & Domes, G. (2009). Oxytocin, vasopressin, and human social behavior. *Frontiers in neuroendocrinology*, 30(4), 548-557. DOI: <https://doi.org/10.1016/j.yfrne.2009.05.005>

- [33] Krause, D. N., Warfvinge, K., Haanes, K. A., & Edvinsson, L. (2021). Hormonal influences in migraine—interactions of oestrogen, oxytocin and CGRP. *Nature Reviews Neurology*, 1-13. DOI: <https://doi.org/10.1038/s41582-021-00544-2>
- [34] Schneider, E., Müller, L., Ditzen, B., Herpertz, S., & Bertsch, K. (2021). Oxytocin and social anxiety: Interactions with sex hormones. *Psychoneuroendocrinology*, 128, 105224. DOI: <https://doi.org/10.1016/j.psyneuen.2021.105224>
- [35] Lieberz, J., Scheele, D., Spengler, F. B., Matheisen, T., Schneider, L., Stoffel-Wagner, B., Kinfe, T. M. & Hurlmann, R. (2020). Kinetics of oxytocin effects on amygdala and striatal reactivity vary between women and men. *Neuropsychopharmacology*, 45(7), 1134-1140. DOI: <https://doi.org/10.1038/s41386-019-0582-6>
- [36] Raam, T., McAvoy, K. M., Besnard, A., Veenema, A. H., & Sahay, A. (2017). Hippocampal oxytocin receptors are necessary for discrimination of social stimuli. *Nature communications*, 8(1), 1-14. DOI: <https://doi.org/10.1038/s41467-017-02173-0>
- [37] Ferguson, J. N., Young, L. J., Hearn, E. F., Matzuk, M. M., Insel, T. R., & Winslow, J. T. (2000). Social amnesia in mice lacking the oxytocin gene. *Nature genetics*, 25(3), 284-288. DOI: <https://doi.org/10.1038/77040>
- [38] Heinrichs, M., Meinlschmidt, G., Wippich, W., Ehlert, U., & Hellhammer, D. H. (2004). Selective amnesic effects of oxytocin on human memory. *Physiology & behavior*, 83(1), 31-38. DOI: <https://doi.org/10.1016/j.physbeh.2004.07.020>
- [39] Bate, S., Bennetts, R., Parris, B. A., Bindemann, M., Udale, R., & Bussunt, A. (2015). Oxytocin increases bias, but not accuracy, in face recognition line-ups. *Social cognitive and affective neuroscience*, 10(7), 1010-1014. DOI: <https://doi.org/10.1093/scan/nsu150>
- [40] Guastella, A. J., Mitchell, P. B., & Mathews, F. (2008). Oxytocin enhances the encoding of positive social memories in humans. *Biological psychiatry*, 64(3), 256-258. DOI: <https://doi.org/10.1016/j.biopsych.2008.02.008>
- [41] Rimmele, U., Hediger, K., Heinrichs, M., & Klaver, P. (2009). Oxytocin makes a face in memory familiar. *Journal of Neuroscience*, 29(1), 38-42. DOI: <https://doi.org/10.1523/JNEUROSCI.4260-08.2009>
- [42] Savaskan, E., Ehrhardt, R., Schulz, A., Walter, M., & Schächinger, H. (2008). Post-learning intranasal oxytocin modulates human memory for facial identity. *Psychoneuroendocrinology*, 33(3), 368-374. DOI: <https://doi.org/10.1016/j.psyneuen.2007.12.004>
- [43] Striepens, N., Scheele, D., Kendrick, K. M., Becker, B., Schäfer, L., Schwalba, K., Reul, J., Maier, W. & Hurlmann, R. (2012). Oxytocin facilitates protective responses to aversive social stimuli in males. *Proceedings of the National Academy of Sciences*, 109(44), 18144-18149. DOI: <https://doi.org/10.1073/pnas.1208852109>
- [44] Wagner, U., & Echterhoff, G. (2018). When does oxytocin affect human memory encoding? The role of social context and individual attachment style. *Frontiers in human neuroscience*, 12, 349. DOI: <https://doi.org/10.3389/fnhum.2018.00349>
- [45] Suzuki, S., & Handa, R. J. (2005). Estrogen receptor- $\beta$ , but not estrogen receptor- $\alpha$ , is expressed in prolactin neurons of the female rat paraventricular and supraoptic nuclei: Comparison with other neuropeptides. *Journal of Comparative Neurology*, 484(1), 28-42. DOI: <https://doi.org/10.1002/cne.20457>
- [46] Frankiensztajn, L. M., Gur-Pollack, R., & Wagner, S. (2018). A combinatorial modulation of synaptic plasticity in the rat medial amygdala by oxytocin, urocortin3 and estrogen. *Psychoneuroendocrinology*, 92, 95-102. DOI: <https://doi.org/10.1016/j.psyneuen.2018.04.006>
- [47] Acevedo-Rodriguez, A., Mani, S. K., & Handa, R. J. (2015). Oxytocin and estrogen receptor  $\beta$  in the brain: an overview. *Frontiers in endocrinology*, 6, 160. DOI: <https://doi.org/10.3389/fendo.2015.00160>
- [48] McCarthy, M. M., McDonald, C. H., Brooks, P. J., & Goldman, D. (1996). An anxiolytic action of oxytocin is enhanced by estrogen in the mouse. *Physiology & behavior*, 60(5), 1209-1215. DOI: [https://doi.org/10.1016/S0031-9384\(96\)00212-0](https://doi.org/10.1016/S0031-9384(96)00212-0)
- [49] Young, L. J., Wang, Z., Donaldson, R., & Rissman, E. F. (1998). Estrogen receptor  $\alpha$  is essential for induction of oxytocin receptor by estrogen. *Neuroreport*, 9(5), 933-936. DOI: <https://doi.org/10.1097/00001756-199803300-00031>



- [50] Chiodera, P., Volpi, R., Capretti, L., Marchesi, C., d'Amato, L., De Ferri, A., Bianconi, L. & Coiro, V. (1991). Effect of estrogen or insulin-induced hypoglycemia on plasma oxytocin levels in bulimia and anorexia nervosa. *Metabolism*, 40(11), 1226-1230. DOI: [https://doi.org/10.1016/0026-0495\(91\)90220-q](https://doi.org/10.1016/0026-0495(91)90220-q)
- [51] Hammes, S. R., & Levin, E. R. (2019). Impact of estrogens in males and androgens in females. *The Journal of clinical investigation*, 129(5), 1818-1826. DOI: <https://doi.org/10.1172/JCI125755>
- [52] Frick, K. M., Kim, J., & Koss, W. A. (2018). Estradiol and hippocampal memory in female and male rodents. *Current opinion in behavioral sciences*, 23, 65-74. DOI: <https://doi.org/10.1016/j.cobeha.2018.03.011>
- [53] Lin, Y.-T., & Hsu, K.-S. (2018). Oxytocin receptor signaling in the hippocampus: Role in regulating neuronal excitability, network oscillatory activity, synaptic plasticity and social memory. *Progress in neurobiology*, 171, 1-14. DOI: <https://doi.org/10.1016/j.pneurobio.2018.10.003>
- [54] Jacome, L. F., Barateli, K., Buitrago, D., Lema, F., Frankfurt, M., & Luine, V. N. (2016). Gonadal hormones rapidly enhance spatial memory and increase hippocampal spine density in male rats. *Endocrinology*, 157(4), 1357-1362. DOI: <https://doi.org/10.1210/en.2015-1959>
- [55] Locklear, M., & Kritzer, M. (2014). Assessment of the effects of sex and sex hormones on spatial cognition in adult rats using the Barnes maze. *Hormones and behavior*, 66(2), 298-308. DOI: <https://doi.org/10.1016/j.yhbeh.2014.06.006>
- [56] Vázquez-Pereyra, F., Rivas-Arancibia, S., Loaeza-Del Castillo, A., & Schneider-Rivas, S. (1995). Modulation of short term and long term memory by steroid sexual hormones. *Life sciences*, 56(14), PL255-PL260. DOI: [https://doi.org/10.1016/0024-3205\(95\)00067-G](https://doi.org/10.1016/0024-3205(95)00067-G)
- [57] Owen, S. F., Tuncdemir, S. N., Bader, P. L., Tirko, N. N., Fishell, G., & Tsien, R. W. (2013). Oxytocin enhances hippocampal spike transmission by modulating fast-spiking interneurons. *Nature*, 500(7463), 458-462. DOI: <https://doi.org/10.1038/nature12330>
- [58] Lin, Y.-T., Hsieh, T.-Y., Tsai, T.-C., Chen, C.-C., Huang, C.-C., & Hsu, K.-S. (2018). Conditional deletion of hippocampal CA2/CA3a oxytocin receptors impairs the persistence of long-term social recognition memory in mice. *Journal of Neuroscience*, 38(5), 1218-1231. DOI: <https://doi.org/10.1523/JNEUROSCI.1896-17.2017>
- [59] Park, S.-H., Kim, Y.-J., Park, J.-C., Han, J.-S., & Choi, S.-Y. (2017). Intranasal oxytocin following uncontrollable stress blocks impairments in hippocampal plasticity and recognition memory in stressed rats. *International Journal of Neuropsychopharmacology*, 20(10), 861-866. DOI: <https://doi.org/10.1093/ijnp/pyx061>
- [60] Unkelbach, C., Guastella, A. J., & Forgas, J. P. (2008). Oxytocin selectively facilitates recognition of positive sex and relationship words. *Psychological science*, 19(11), 1092-1094. DOI: <https://doi.org/10.1111/j.1467-9280.2008.02206.x>
- [61] Herzmann, G., Young, B., Bird, C. W., & Curran, T. (2012). Oxytocin can impair memory for social and non-social visual objects: a within-subject investigation of oxytocin's effects on human memory. *Brain research*, 1451, 65-73. DOI: <https://doi.org/10.1016/j.brainres.2012.02.049>
- [62] Maier, A., Scheele, D., Spengler, F. B., Menba, T., Mohr, F., Güntürkün, O., Stoffel-Wagner, B., Kinfe, T. M., Maier, W., Khalsa, S. S. & Hurlemann, R. (2019). Oxytocin reduces a chemosensory-induced stress bias in social perception. *Neuropsychopharmacology*, 44(2), 281-288. DOI: <https://doi.org/10.1038/s41386-018-0063-3>
- [63] Wittfoth-Schardt, D., Gründing, J., Wittfoth, M., Lanfermann, H., Heinrichs, M., Domes, G., Buchheim, A., Gündel, H. & Waller, C. (2012). Oxytocin modulates neural reactivity to children's faces as a function of social salience. *Neuropsychopharmacology*, 37(8), 1799-1807. DOI: <https://doi.org/10.1038/npp.2012.47>
- [64] Johnson, A. E., Coirini, H., Insel, T. R., & McEwen, B. S. (1991). The regulation of oxytocin receptor binding in the ventromedial hypothalamic nucleus by testosterone and its metabolites. *Endocrinology*, 128(2), 891-896. DOI: <https://doi.org/10.1210/endo-128-2-891>

- [65] Spengler, F. B., Scheele, D., Marsh, N., Kofferath, C., Flach, A., Schwarz, S., Stoffel-Wagner, B., Maier, W. & Hurlmann, R. (2017). Oxytocin facilitates reciprocity in social communication. *Social cognitive and affective neuroscience*, 12(8), 1325-1333. DOI: <https://doi.org/10.1093/scan/nsx061>
- [66] Scheele, D., Plota, J., Stoffel-Wagner, B., Maier, W., & Hurlmann, R. (2016). Hormonal contraceptives suppress oxytocin-induced brain reward responses to the partner's face. *Social cognitive and affective neuroscience*, 11(5), 767-774. DOI: <https://doi.org/10.1093/scan/nsv157>
- [67] Fischer-Shofty, M., Levkovitz, Y., & Shamay-Tsoory, S. G. (2013). Oxytocin facilitates accurate perception of competition in men and kinship in women. *Social cognitive and affective neuroscience*, 8(3), 313-317. DOI: <https://doi.org/10.1093/scan/nsr100>
- [68] Ditzen, B., Nater, U. M., Schaer, M., La Marca, R., Bodenmann, G., Ehler, U., & Heinrichs, M. (2013). Sex-specific effects of intranasal oxytocin on autonomic nervous system and emotional responses to couple conflict. *Social cognitive and affective neuroscience*, 8(8), 897-902. DOI: <https://doi.org/10.1093/scan/nss083>
- [69] Gressner, A. M., & Arndt, T. (2013). *Lexikon der medizinischen Laboratoriumsdiagnostik*: Springer-Verlag.
- [70] Foster, T. C. (2012). Role of estrogen receptor alpha and beta expression and signaling on cognitive function during aging. *Hippocampus*, 22(4), 656-669. DOI: <https://doi.org/10.1002/hipo.20935>
- [71] Szymczak, S., Kalita, K., Jaworski, J., Mioduszevska, B., Savonenko, A., Markowska, A., Merchenthaler, I. & Kaczmarek, L. (2006). Increased estrogen receptor  $\beta$  expression correlates with decreased spine formation in the rat hippocampus. *Hippocampus*, 16(5), 453-463. DOI: <https://doi.org/10.1002/hipo.20172>
- [72] Knobloch, H. S., Charlet, A., Hoffmann, L. C., Eliava, M., Khrulev, S., Cetin, A. H., Osten, P., Schwarz, M. K., Seeburg, P. H. & Stoop, R. (2012). Evoked axonal oxytocin release in the central amygdala attenuates fear response. *Neuron*, 73(3), 553-566. DOI: <https://doi.org/10.1016/j.neuron.2011.11.030>
- [73] Viviani, D., Charlet, A., van den Burg, E., Robinet, C., Hurni, N., Abatis, M., Magara, F. & Stoop, R. (2011). Oxytocin selectively gates fear responses through distinct outputs from the central amygdala. *science*, 333(6038), 104-107. DOI: <https://doi.org/10.1126/science.1201043>
- [74] Alia-Klein, N., Preston-Campbell, R. N., Kim, S. W., Pareto, D., Logan, J., Wang, G.-J., Moeller, S. J., Fowler, J. S. & Biegon, A. (2020). Human Cognitive Ability Is Modulated by Aromatase Availability in the Brain in a Sex-Specific Manner. *Frontiers in Neuroscience*, 14, 1061. DOI: <https://doi.org/10.3389/fnins.2020.565668>
- [75] Beking, T., Burke, S., Geuze, R., Staphorsius, A., Bakker, J., Groothuis, A., & Kreukels, B. (2020). Testosterone effects on functional amygdala lateralization: A study in adolescent transgender boys and cisgender boys and girls. *Psychoneuroendocrinology*, 111, 104461. DOI: <https://doi.org/10.1016/j.psyneuen.2019.104461>
- [76] Van Wingen, G., Van Broekhoven, F., Verkes, R., Petersson, K. M., Bäckström, T., Buitelaar, J., & Fernandez, G. (2008). Progesterone selectively increases amygdala reactivity in women. *Molecular psychiatry*, 13(3), 325-333. DOI: <https://doi.org/10.1038/sj.mp.4002030>
- [77] Sheehan, D. V., Lecrubier, Y., Sheehan, K. H., Amorim, P., Janavs, J., Weiller, E., Hergueta, T. & Dunbar, G. C. (1998). The Mini-International Neuropsychiatric Interview (MINI): the development and validation of a structured diagnostic psychiatric interview for DSM-IV and ICD-10. *Journal of clinical psychiatry*, 59(20), 22-33. PMID: 9881538.
- [78] Kratz, A., Ferraro, M., Sluss, P. M., & Lewandrowski, K. B. (2004). Laboratory reference values. *New England Journal of Medicine*, 351, 1548-1564.



- [79] Eisenegger, C., von Eckardstein, A., Fehr, E., & von Eckardstein, S. (2013). Pharmacokinetics of testosterone and estradiol gel preparations in healthy young men. *Psychoneuroendocrinology*, *38*(2), 171-178.  
DOI: <https://doi.org/10.1016/j.psyneuen.2012.05.018>
- [80] Olsson, A., Kopsida, E., Sorjonen, K., & Savic, I. (2016). Testosterone and estrogen impact social evaluations and vicarious emotions: A double-blind placebo-controlled study. *Emotion*, *16*(4), 515. DOI: <https://doi.org/10.1037/a0039765>
- [81] Guastella, A. J., Hickie, I. B., McGuinness, M. M., Otis, M., Woods, E. A., Disinger, H. M., Chan, H. K., Chen, T. F., & Banati, R. B. (2013). Recommendations for the standardisation of oxytocin nasal administration and guidelines for its reporting in human research. *Psychoneuroendocrinology*, *38*(5), 612-625.  
DOI: <https://doi.org/10.1016/j.psyneuen.2012.11.019>
- [82] Striepens, N., Kendrick, K. M., Hanking, V., Landgraf, R., Wüllner, U., Maier, W., & Hurlmann, R. (2013). Elevated cerebrospinal fluid and blood concentrations of oxytocin following its intranasal administration in humans. *Scientific reports*, *3*(1), 1-5.  
DOI: <https://doi.org/10.1038/srep03440>
- [83] Lee, M., Scheidweiler, K., Diao, X., Akhlaghi, F., Cummins, A., Huestis, M., Leggio, L. & Averbeck, B. (2018). Oxytocin by intranasal and intravenous routes reaches the cerebrospinal fluid in rhesus macaques: determination using a novel oxytocin assay. *Molecular psychiatry*, *23*(1), 115-122. DOI: <https://doi.org/10.1038/mp.2017.27>
- [84] Lee, M., Shnitko, T., Blue, S., Kaucher, A., Winchell, A., Erikson, D., Grant, K. A. & Leggio, L. (2020). Labeled oxytocin administered via the intranasal route reaches the brain in rhesus macaques. *Nature communications*, *11*(1), 1-10. DOI: <https://doi.org/10.1038/s41467-020-15942-1>
- [85] Stanislaw, H., & Todorov, N. (1999). Calculation of signal detection theory measures. *Behavior Research Methods, Instruments, & Computers*, *31*(1), 137-149.  
DOI: <https://doi.org/10.3758/BF03207704>
- [86] Hautus, M. J. (1995). Corrections for extreme proportions and their biasing effects on estimated values of d'. *Behavior Research Methods, Instruments, & Computers*, *27*(1), 46-51.  
DOI: <https://doi.org/10.3758/BF03203619>
- [87] Haatveit, B. C., Sundet, K., Hugdahl, K., Ueland, T., Melle, I., & Andreassen, O. A. (2010). The validity of d prime as a working memory index: results from the "Bergen n-back task". *Journal of Clinical and Experimental Neuropsychology*, *32*(8), 871-880.  
DOI: <https://doi.org/10.3758/BF03203619>
